# Supplementary material for: A frontal attention mechanism in the visual mismatch negativity
Source: PubMed Central journal article supplement (PMC4566935; doi:10.1016/j.bbr.2015.07.022), 2015-10-15
Supplement: mmc1.pdf [file mmc1.pdf]

### Supplementary Info A

**Supplementary Table A1.** Mean reaction times to targets for each condition and stimulus combination in the EEG and fMRI sessions. Standard deviations are shown in parentheses.

|                      | EEG           |               | fMRI          |               |
|----------------------|---------------|---------------|---------------|---------------|
|                      | Combination A | Combination B | Combination A | Combination B |
| Standard only blocks | 389ms (45)    | 401ms (43)    | 436ms (94)    | 449ms (94)    |
| Deviant blocks       | 402ms (48)    | 399ms (41)    | 437ms (87)    | 446ms (83)    |

1  
2  
3  
4  
5  
6  
7  
8  
9  
10  
11  
12  
13  
14  
15  
16  
17  
18  
19  
20  
21  
22  
23  
24  
25  
26  
27  
28  
29  
30  
31  
32  
33  
34  
35  
36  
37  
38  
39  
40  
41  
42  
43  
44  
45  
46  
47  
48  
49  
50  
51  
52  
53  
54  
55  
56  
57  
58  
59  
60  
61  
62  
63  
64  
65

Supplementary Info B1

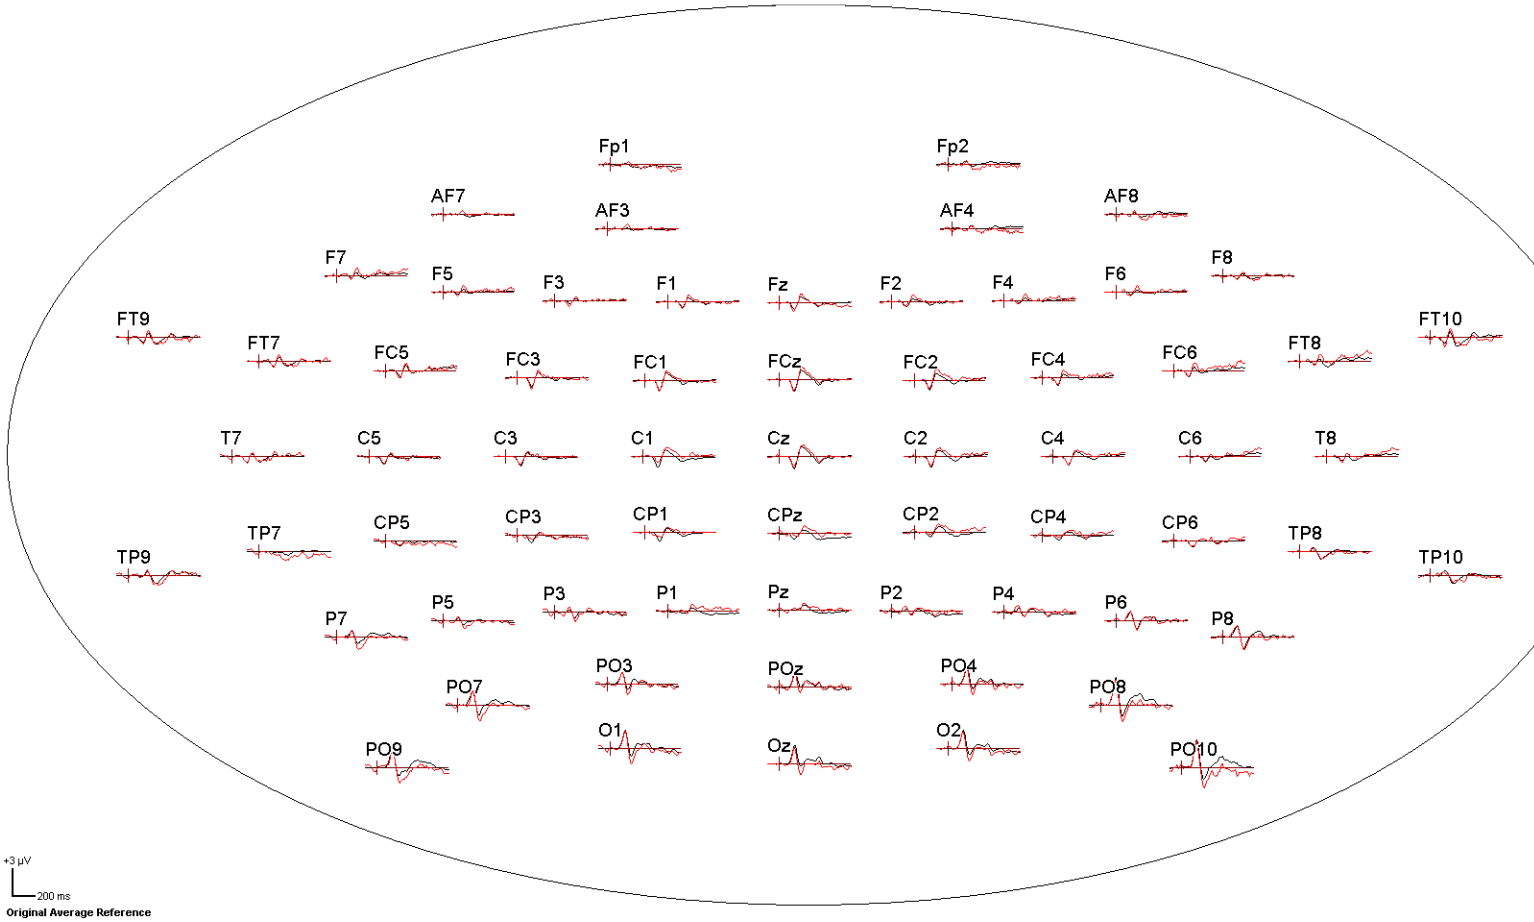

Supplementary Figure B1.64 electrode grand average plots of responses to standard (black) and deviant (red) stimuli for Stimuli combination A, referenced to a common average reference.

2  
3  
4  
5  
6  
7  
8  
9  
10 **Supplementary Info B2**

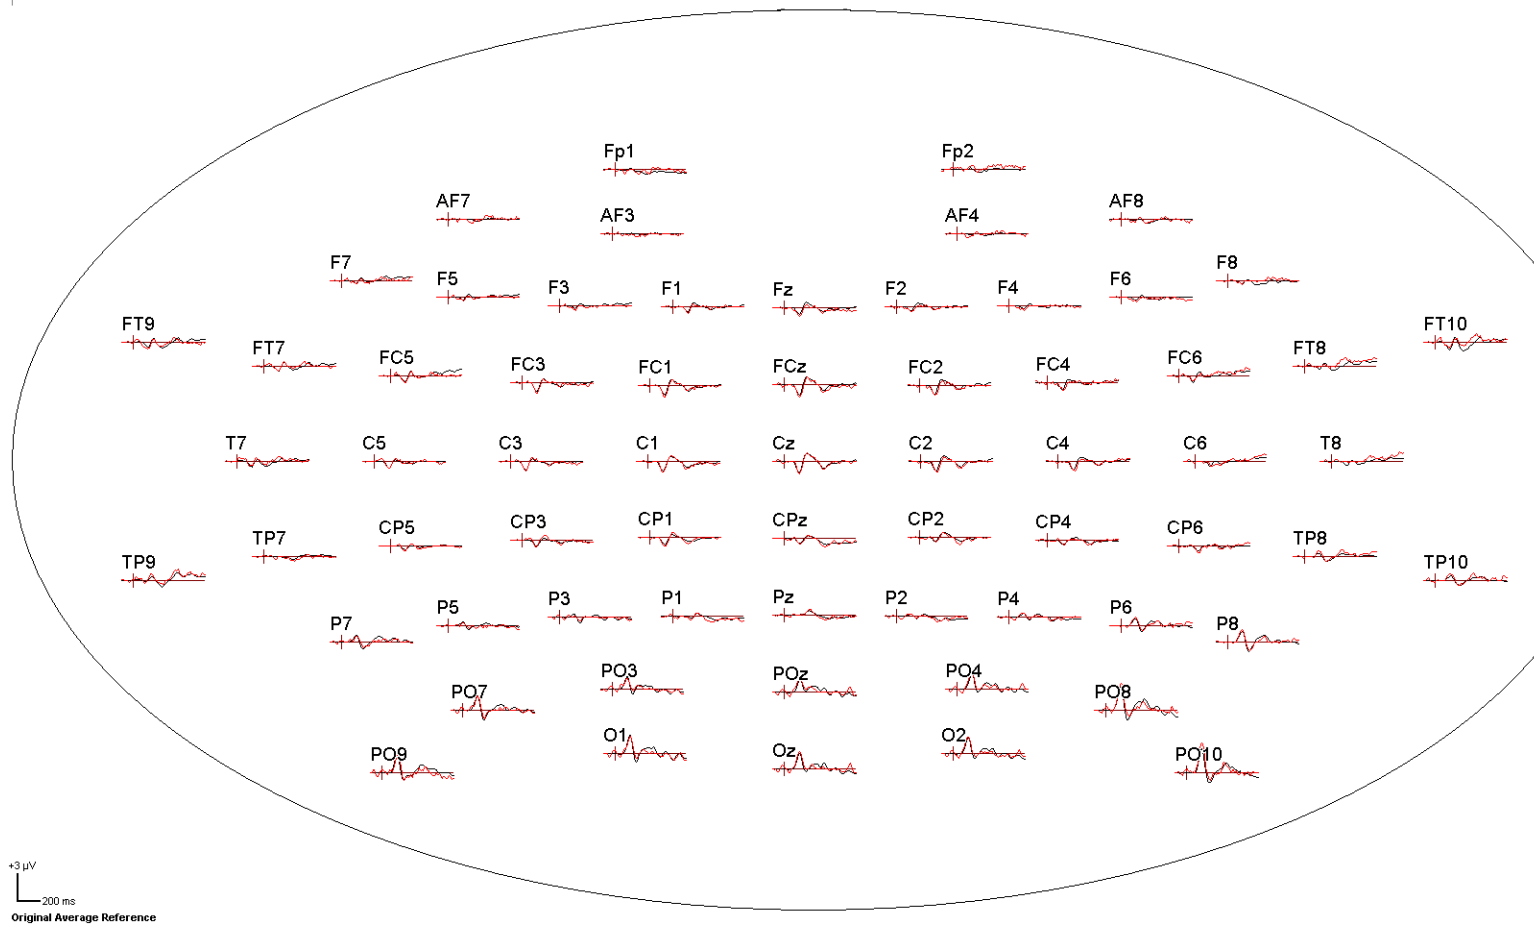

46 **Supplementary Figure B2.64** electrode grand average plots of responses to standard (black) and deviant (red)  
47 stimuli for Stimuli combination B, referenced to a common average reference.  
48  
49

50  
51  
52  
53  
54  
55  
56  
57  
58  
59  
60  
61  
62  
63  
64  
65

## Supplementary Info C

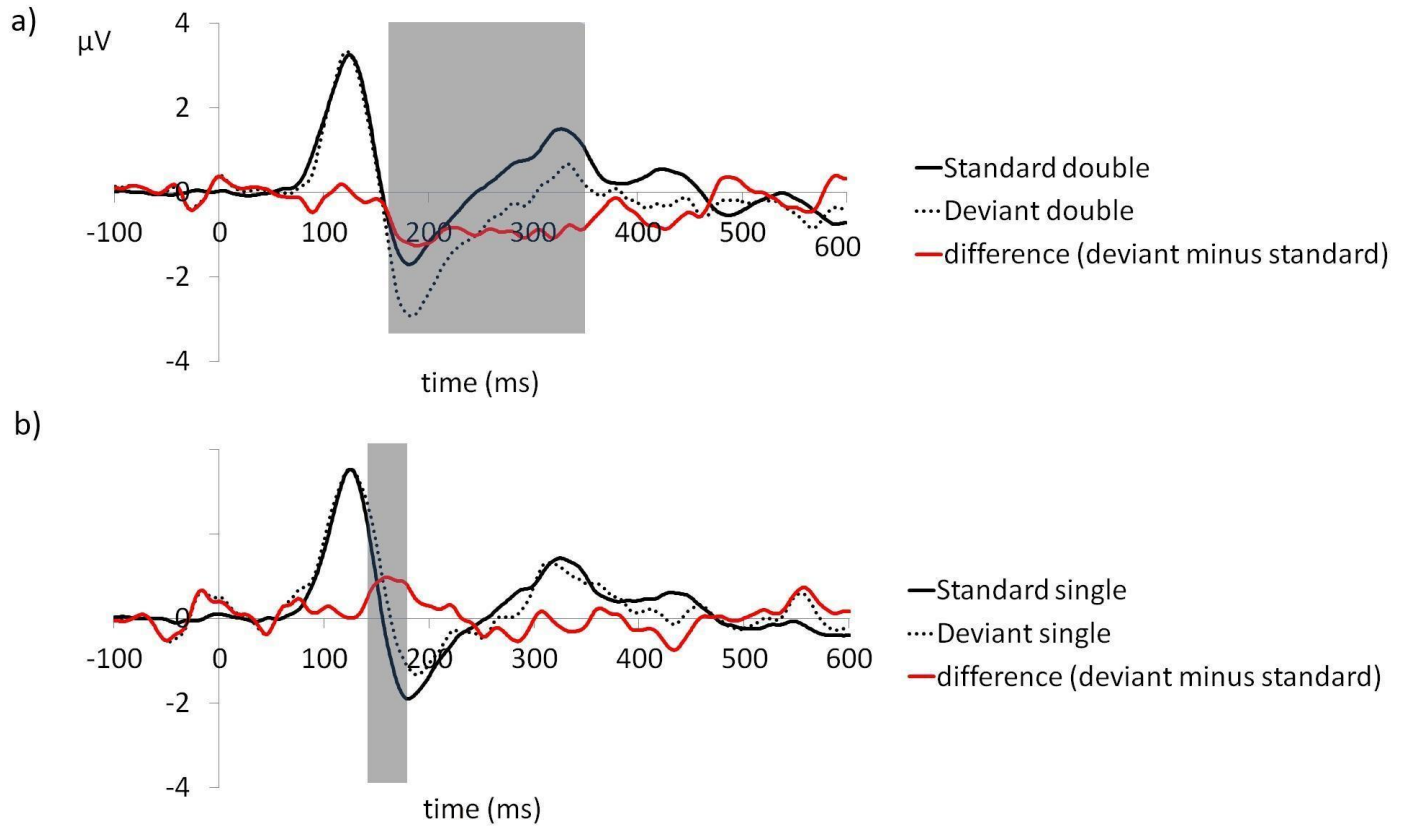

**Supplementary Figure C.** Grand average waveforms for a) Double bars as standards and deviants b) Single

bars as standards and deviants. The difference waveforms (i.e. deviant minus standard) are displayed in red.

Values are based on the average voltage of the occipital region of interest electrodes (O1, Oz, O2, PO9, PO10,

PO7 & PO8). Shaded areas indicate epochs of significant difference ( $p < 0.05$ ) between responses to standard

and deviant stimuli

7 **Supplementary Info D.**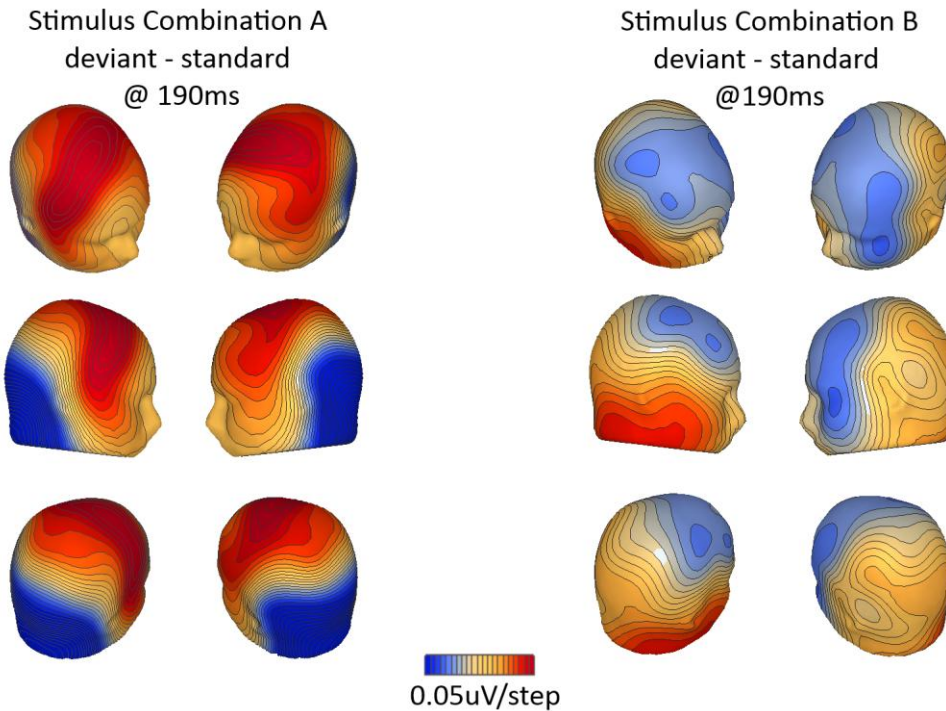

34 **Supplementary Figure D.** Topographic distribution illustrating the vMMN for Stimulus Combination A and  
35 the absence of vMMN for Stimulus Combination B. Plots indicate the difference in voltage distribution (deviant  
36 minus standard) across the scalp at the peak latency (190ms) of the vMMN in response to Stimulus  
37 Combination A. No vMMN was observed in response to Stimulus Combination B. Red indicates positive  
38 voltage, blue indicates negative voltage.
